# Supplementary material
Source: PubMed Central journal article supplement (PMC8192298)
Supplement: mmc1.pdf [file mmc1.pdf]

# THE LANCET

## Child & Adolescent Health

### Supplementary appendix

This appendix formed part of the original submission and has been peer reviewed. We post it as supplied by the authors.

Supplement to: Oliveira EA, Colosimo EA, Simões e Silva AC, et al. Clinical characteristics and risk factors for death among hospitalised children and adolescents with COVID-19 in Brazil: an analysis of a nationwide database. *Lancet Child Adolesc Health* 2021; published online June 10. [https://doi.org/10.1016/S2352-4642\(21\)00134-6](https://doi.org/10.1016/S2352-4642(21)00134-6).

## Supplementary material to

### **Clinical characteristics and risk factors of mortality among 11,613 hospitalized children and adolescents with COVID-19: an analysis of a nationwide database Lancet Child and Adolescent Health**

#### **Supplementary material (S.1)**

#### **SIVEP-Gripe (The Influenza Epidemiological Surveillance Information System )**

The Influenza Epidemiological Surveillance Information System, SIVEP-Gripe (*Sistema de Informação de Vigilância Epidemiológica da Gripe*), was established by the Brazilian Ministry of Health (MS) in 2009, due to the Influenza A (H1N1) pandemic. This system has been maintained since then for the monitoring of severe acute respiratory syndrome (SARS) cases and surveillance of unusual events associated with respiratory infections in the country. Since then, this sentinel surveillance has been expanded for other respiratory viruses. In 2020, the surveillance of COVID-19 was incorporated into the system network. For the purpose of monitoring hospitalized cases of COVID-19, the Ministry of Health incorporated the testing of the SARS-CoV-2 virus to the surveillance of SARS. Case notification is mandatory, and records are stored in the computerized database SIVEP-Gripe.

In 2020, the Ministry of Health released a “Technical Note” with recommendations for the immediate notification of suspected and confirmed cases of COVID-19. It was recommended that outpatients with mild COVID-19 be notified in the e-SUS VE system and those cases hospitalized be reported in the SIVEP-Gripe system (Technical Note available at <https://www.cosemsg.org.br/site/Arquivos/PDF/nms20.pdf>). Consequently, SIVEP-Gripe came to be the single source for all patients admitted to both public and private hospitals with COVID-19 in Brazil. In practical terms, SIVEP-Gripe has been the primary source of information on all COVID-19 hospital admissions and deaths in the country.

To enter the SIVEP-Gripe database, the case must present flu-like syndrome and at least one of the following criteria: dyspnea or respiratory distress or O<sub>2</sub> saturation less than 95% in room air or cyanosis or symptoms specific for children (intercostal retractions, nasal flaring, dehydration, and inappetence). Also, they need to have been admitted to hospital or died without hospital admission.

Detailed information regarding this database, including reporting form and data dictionary, codes, and all de-identified data, such as individual participant data, are publicly available at <https://opendatasus.saude.gov.br/dataset/bd-srag-2020>.

We downloaded the original database on January 10, 2021 and, for analysis purposes, the original dataset was saved in Excel, SPSS, and STATA versions. Based on the original reporting form and data dictionary, we recoded the variables using similar approach described by Ranzani et al. in a supplementary material (eTable 3) of the paper “Characterisation of the first 250 000 hospital admissions for COVID-19 in Brazil: a retrospective analysis of nationwide data”. *Lancet Respir Med* 2021. (available at [https://www.thelancet.com/journals/lanres/article/PIIS2213-2600\(20\)30560-9/fulltext#supplementaryMaterial](https://www.thelancet.com/journals/lanres/article/PIIS2213-2600(20)30560-9/fulltext#supplementaryMaterial)).

In addition, we created variables for the competing-risk survival analyses. For instance, from the fields “date of admission” and “date of discharge or death” we created the variable `time_event` (in days). In addition, we manually revised the field `morb_desc`, an open-ended one, which included some relevant clinical information, especially related with comorbidities and another risk factors (for example, prematurity). From this field, we created the close-ended field `Malignancy` by manually scrutinizing the field `morb_desc`. Of 11,613 indexed cases, 1,760 (15%) had some observation included in this field. We performed this task in the SPSS statistical package by using the diverse search mechanisms available. Thus, for instance, for the field `Malignancy` we searched all 1,760 cases for any oncology issue and found 583 cases of cancer in this sample. As expected, most cases were related with hematological malignancies like leukemia, lymphoma, or CNS tumors.

## Supplementary material (S.2)

### Sensitivity Analysis

For analysis purposes, in order to evaluate the scope of the sample in SIVEP-Gripe database, we carried on several preliminary analyses with the entire dataset of 11,603 cases < 20 years with laboratory-confirmed COVID-19.

As shown in supplementary material S.1, to enter the SIVEP-Gripe database, the case must present flu-like syndrome and at least one of the following criteria: dyspnea or respiratory distress or O<sub>2</sub> saturation less than 95% in room air or cyanosis or symptoms specific for children (intercostal retractions, nasal flaring, dehydration, and inappetence). Also, they need to have been admitted to hospital or died without hospital admission (<https://opendatasus.saude.gov.br/dataset/bd-srag-2020>).

Of note, our preliminary analysis has shown that only about 47%, 54%, and 41% of the pediatric patients in the sample had respectively dyspnea, respiratory distress, and oxygen saturation <95% at admission (with a significant overlapping between them). As a whole, according to the data available in SIVEP-Gripe database, 7,081 cases (61%) fulfilled the strict criteria for entry in database. In this context, to ascertain the robustness of our analysis further, we created a subset of cases including only those cases who fulfilled the strict criteria to be enrolled in SIVEP-Gripe database. In this subset, 714 (10%) had the primary outcome. Similarly, in this subset we also evaluated the primary outcome by competing risks analysis, using cumulative incidence function (CIF) and Fine and Gray proportional sub-distribution hazards model. Discharge was treated as a competing event. The complete results of sensitivity analysis are presented in supplementary tables (Appendix Tables S.6, Tables S.7, Tables S.8) and in supplementary figures (Figures S.9 and S.10A-D).

It can be observed that these results are very similar to those based on the entire data set of 11603 cases. There are very minor differences in the univariate analysis presented in Table S.5 when compared to Table S.7, for instance, regarding variable “Asian ethnicity” for both competitive outcomes. On the other hand, and more important, multivariate analysis for both datasets are in complete agreement showing the robustness of the results based on the entire dataset. A final issue in this comparison should be highlighted. The analysis based on the entire data set, that is larger than the strict criterion one, is naturally more precise. The smaller length of the confidence intervals is the most notable evidence of this fact.

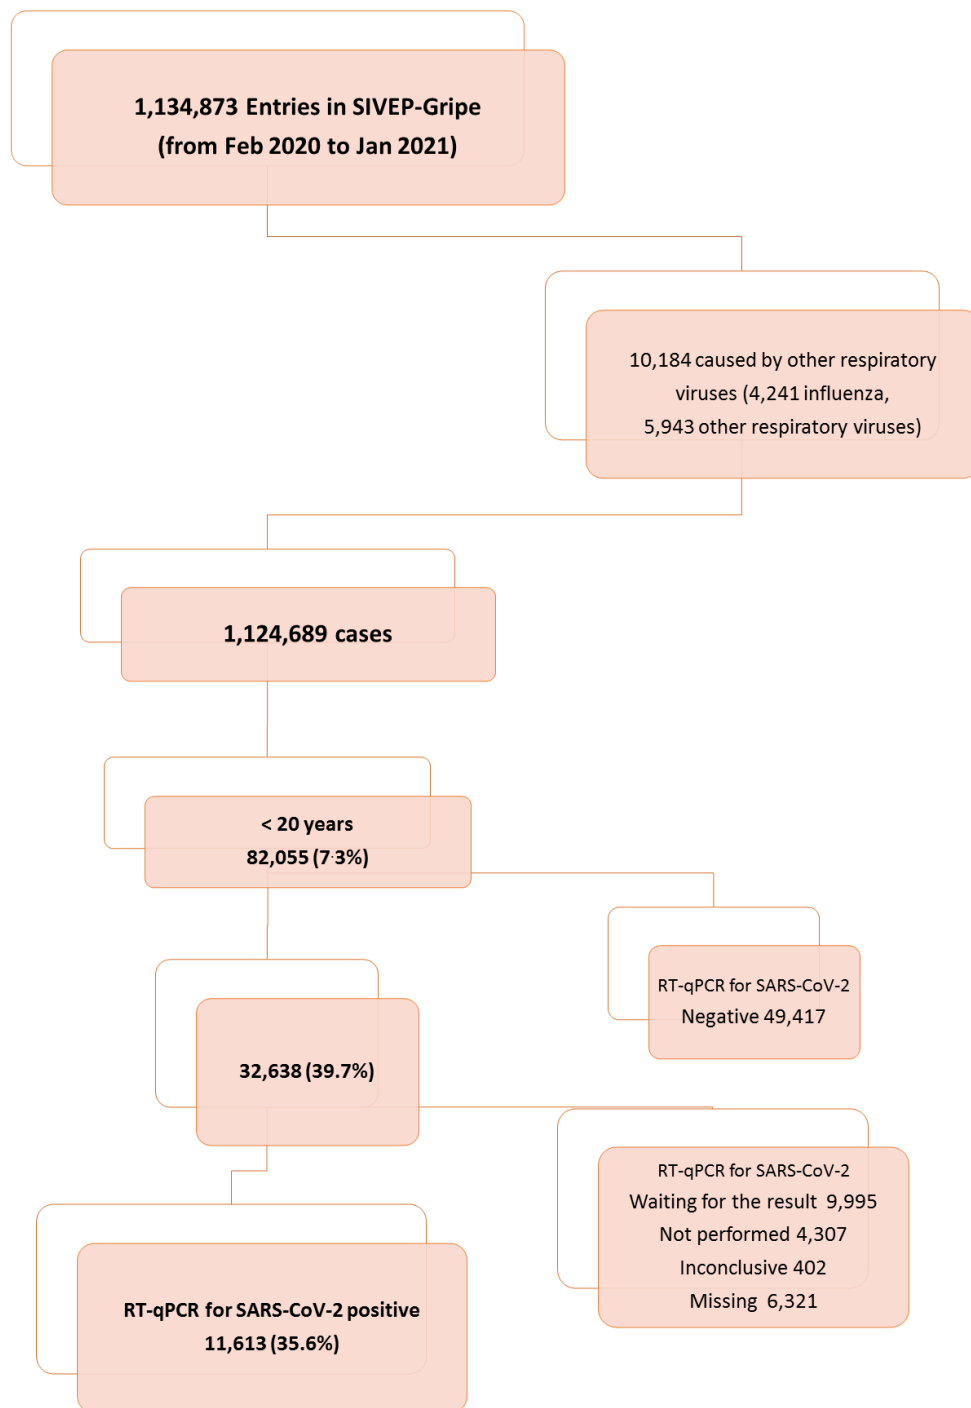

Figure S.3. Flow diagram of sample selection

**Table S.4. Demographic and clinical characteristics of children with positive RT-qPCR COVID-19 according to the Brazilian macroregions**

|                            | <b>North (%)</b> | <b>Northeast (%)</b> | <b>Central-West (%)</b> | <b>Southeast (%)</b> | <b>South (%)</b> |
|----------------------------|------------------|----------------------|-------------------------|----------------------|------------------|
|                            | <b>1,841</b>     | <b>3,388</b>         | <b>1,356</b>            | <b>4,065</b>         | <b>963</b>       |
| Cases /million young pop.  | 3304             | 2270                 | 3300                    | 2105                 | 1445             |
| Age (years)                |                  |                      |                         |                      |                  |
| Median (IQR)               | 40 (1 – 130)     | 42 (0.7 – 130)       | 9.8 (2 – 17.0)          | 5.3 (1 – 14.0)       | 5.5 (1 – 15.0)   |
| Mean (SD)                  | 6.9 (6.7)        | 6.8 (6.2)            | 9.8 (7.2)               | 7.5 (6.9)            | 7.8 (7.2)        |
| Age group (years)          |                  |                      |                         |                      |                  |
| 0 - 1.9                    | 692 (35.6)       | 1318 (38.9)          | 337 (24.8)              | 1375 (33.9)          | 329 (34.2)       |
| 2 – 4.9                    | 294 (16.0)       | 495 (14.6)           | 147 (10.8)              | 607 (14.9)           | 141 (14.6)       |
| 5 – 11.9                   | 353 (19.1)       | 661 (19.5)           | 268 (19.7)              | 830 (20.4)           | 177 (18.3)       |
| 12 – 19.9                  | 502 (27.2)       | 914 (26.9)           | 604 (44.5)              | 1253 (30.8)          | 316 (32.8)       |
| Gender (n = 11,600)        |                  |                      |                         |                      |                  |
| Male                       | 953 (51.8)       | 1807 (53.5)          | 675 (49.8)              | 2083 (51.3)          | 514 (53.4)       |
| Female                     | 888 (48.2)       | 1570 (46.5)          | 681 (50.2)              | 1980 (48.7)          | 449 (46.6)       |
| Ethnicity (n = 9,109)      |                  |                      |                         |                      |                  |
| White                      | 157 (8.9)        | 343 (13.2)           | 286 (30.6)              | 1734 (56.0)          | 671 (82.5)       |
| Black / Brown              | 1501 (85.3)      | 2204 (85.4)          | 619 (66.2)              | 1326 (42.8)          | 134 (16.4)       |
| Asian                      | 11 (0.6)         | 23 (0.8)             | 15 (1.6)                | 27 (0.8)             | 3 (0.3)          |
| Indigenous                 | 90 (5.1)         | 11 (0.4)             | 14 (1.4)                | 7 (0.2)              | 5 (0.6)          |
| Number of comorbidities    |                  |                      |                         |                      |                  |
| None                       | 1488 (80.8)      | 2382 (70.3)          | 1115 (82.2)             | 2751 (67.7)          | 616 (63.4)       |
| 1                          | 309 (16.8)       | 898 (26.5)           | 211 (15.5)              | 1088 (26.7)          | 274 (28.4)       |
| 2                          | 39 (2.1)         | 95 (2.8)             | 24 (1.8)                | 191 (4.7)            | 54 (5.6)         |
| >3                         | 5 (0.3)          | 13 (0.38)            | 6 (0.44)                | 35 (0.86)            | 19 (2.0)         |
| ICU admission (n = 11,074) |                  |                      |                         |                      |                  |
| No                         | 1495 (84.6)      | 2314 (73.3)          | 1051 (83.4)             | 2728 (69.4)          | 727 (76.0)       |
| Yes                        | 273 (15.4)       | 843 (26.7)           | 291 (16.6)              | 2015 (30.6)          | 229 (24.0)       |
| Death rate (n = 10,867)    |                  |                      |                         |                      |                  |
| No                         | 1592 (91.5)      | 2743 (89.5)          | 1199 (96.3)             | 3657 (94.3)          | 882 (93.5)       |
| Yes                        | 147 (8.5)        | 320 (10.5)           | 46 (3.7)                | 220 (5.7)            | 61 (6.5)         |

Data (n) in the first column represent the available data for those variables with missing values (gender, ethnicity, and signs and symptoms at presentation).

For comorbidities, we assumed missing values as the absence of the clinical condition.

**Table S5. Univariate survival analysis competitive risk according to the demographic and clinical characteristics of children with positive RT-qPCR COVID-19**

|                                | <b>Discharge (%)*</b><br><b>10,410 (92.2)</b> | <b>HR (95% CI)</b> | <b>P-value</b> | <b>Death (%)*</b><br><b>886 (7.8)</b> | <b>HR (95% CI)</b> | <b>P-value</b> |
|--------------------------------|-----------------------------------------------|--------------------|----------------|---------------------------------------|--------------------|----------------|
| <b>Age (years)</b>             |                                               |                    |                |                                       |                    |                |
| Median (IQR)                   | 5.2 (1.0 – 14.3)                              | 0.98 (0.98, 0.99)  | <0.001         | 5.5 (0.5 – 15.9)                      | 1.00 (0.99, 1.01)  | 0.076          |
| Mean (SD)                      | 7.5 (6.8)                                     |                    |                | 8.0 (7.5)                             |                    |                |
| <b>Age group (years)</b>       |                                               |                    |                |                                       |                    |                |
| 0 - 1.9                        | 3,548 (34.1)                                  | 0.86 (0.83;0.90)   | <0.001         | 354 (40.0)                            | 1.88 (1.58; 2.24)  | <0.001         |
| 2 – 11.9                       | 3,788 (35.5)                                  | 1.0                |                | 194 (21.9)                            | 1.0                |                |
| 12 – 19.9                      | 3,164 (30.4)                                  | 0.75 (0.72; 0.79)  | <0.001         | 338 (38.1)                            | 1.98 (1.65; 2.36)  | <0.001         |
| <b>Gender**</b>                |                                               |                    |                |                                       |                    |                |
| Male                           | 5,402 (51.9)                                  | 1.01 (0.98; 1.05)  | 0.317          | 466 (52.7)                            | 1.02 (0.9; 1.16)   | 0.701          |
| <b>Region</b>                  |                                               |                    |                |                                       |                    |                |
| Southeast                      | 3,756 (36.1)                                  | 1.0                |                | 236 (26.6)                            | 1.0                |                |
| South                          | 887 (8.5)                                     | 1.03 (0.95;1.11)   | 0.463          | 63 (7.1)                              | 1.11 (0.84; 1.46)  | 0.450          |
| Central-West                   | 1,283 (12.3)                                  | 0.75 (0.71; 0.79)  | <0.001         | 49 (5.5)                              | 0.62 (0.45; 0.84)  | 0.003          |
| Northeast                      | 2,840 (27.3)                                  | 0.68 (0.65; 0.71)  | <0.001         | 377 (42.6)                            | 2.03 (1.72; 2.38)  | <0.001         |
| North                          | 1,644 (15.8)                                  | 0.83 (0.78; 0.88)  | <0.001         | 161 (18.2)                            | 1.53 (1.25; 1.87)  | <0.001         |
| <b>Race#</b>                   |                                               |                    |                |                                       |                    |                |
| White                          | 2,919 (35.8)                                  | 1.0                |                | 214 (28.9)                            | 1.0                |                |
| Black / Brown                  | 5,112 (62.3)                                  | 0.85 (0.81; 0.89)  | <0.001         | 493 (66.5)                            | 1.30 (1.11;1.53)   | 0.001          |
| Asian                          | 70 (0.9)                                      | 0.79 (0.62; 0.99)  | 0.045          | 8 (1.1)                               | 1.50 (0.75; 3.02)  | 0.247          |
| Indigenous                     | 100 (1.2)                                     | 0.67 (0.54; 0.83)  | <0.001         | 26 (3.5)                              | 3.27 (2.17; 4.93)  | <0.001         |
| <b>Signs and symptoms</b>      |                                               |                    |                |                                       |                    |                |
| Fever                          | 6,984 (75.0)                                  | 0.98 (0.94, 1.03)  | 0.53           | 559 (73.9)                            | 0.97 (0.82, 1.14)  | 0.72           |
| Cough                          | 6,206 (68.4)                                  | 1.11 (1.06, 1.15)  | <0.001         | 413 (58.8)                            | 0.68 (0.58, 0.79)  | <0.001         |
| Odynophagia                    | 1,926 (24.8)                                  | 0.97 (0.92, 1.01)  | 0.22           | 109 (18.4)                            | 0.69 (0.56, 0.85)  | <0.001         |
| Respiratory distress           | 4,385 (52.3)                                  | 0.78 (0.75, 0.81)  | < 0.001        | 564 (75.9)                            | 2.78 (2.35, 3.29)  | <0.001         |
| O2 saturation <95%             | 3,061 (38.1)                                  | 0.69 (0.66, 0.72)  | < 0.001        | 504 (70.5)                            | 3.66 (3.11, 4.30)  | <0.001         |
| Dyspnea                        | 4,783 (45.9)                                  | 0.80 (0.72;0.83)   | < 0.001        | 581 (65.6)                            | 2.65 (2.23;3.14)   | <0.001         |
| Anosmia                        | 317 (7.5)                                     | 0.97 (0.88, 1.07)  | 0.60           | 14 (5.0)                              | 0.65 (0.38, 1.12)  | 0.12           |
| Ageusia                        | 297 (7.1)                                     | 0.99 (0.89, 1.02)  | 0.25           | 13 (4.6)                              | 0.64 (0.36, 1.12)  | 0.12           |
| Diarrhea                       | 1,657 (21.2)                                  | 1.03 (0.98, 1.09)  | 0.14           | 117 (19.1)                            | 0.88 (0.72, 1.08)  | 0.23           |
| Vomit                          | 1,821 (23.2)                                  | 1.01 (0.96,1.06)   | 0.57           | 147 (23.4)                            | 1.00 (0.82, 1.21)  | 0.95           |
| Abdominal pain                 | 607 (14.0)                                    | 0.99 (0.91, 1.07)  | 0.87           | 45 (14.7)                             | 1.04 (0.75, 1.43)  | 0.78           |
| Comorbidity (yes/no)           | 2,715 (26.1)                                  | 0.78 (0.74; 0.81)  | <0.001         | 448 (50.6)                            | 2.26 (1.98; 2.58)  | <0.001         |
| <b>Number of comorbidities</b> |                                               |                    |                |                                       |                    |                |
| None                           | 7695 (73.9)                                   | 1                  |                | 438 (49.4)                            | 1.0                | <0.001         |
| 1                              | 2,352 (22.6)                                  | 0.77 (0.73,0.81)   | <0.001         | 347 (39.2)                            | 2.42 (2.10, 2.79)  |                |
| 2                              | 308 (3.0)                                     | 0.56 (0.50, 0.63)  | <0.001         | 81 (9.1)                              | 4.11 (3.25, 5.18)  | <0.001         |
| ≥3                             | 55 (0.5)                                      | 0.44 (0.34, 0.56)  | <0.001         | 20 (2.3)                              | 5.48 (3.55, 8.46)  | <0.001         |
| <b>Main comorbidities</b>      |                                               |                    |                |                                       |                    |                |
| Asthma                         | 823 (7.9)                                     | 1.48 (1.38; 1.59)  | <0.001         | 32 (3.6)                              | 0.60 (0.42; 0.85)  | <0.001         |
| Pulmonary                      | 204 (2.0)                                     | 0.74 (0.65, 0.85)  | <0.001         | 32 (3.6)                              | 1.80 (1.27;2.55)   | 0.001          |
| Neurology                      | 556 (5.3)                                     | 0.61 (0.56, 0.66)  | <0.001         | 125 (14.1)                            | 2.66 (2.20,3.21)   | <0.001         |
| Oncology                       | 445 (4.3)                                     | 0.57 (0.52,0.63)   | <0.001         | 125 (14.1)                            | 3.22 (2.68, 3.87)  | <0.001         |
| Cardiology                     | 276 (2.7)                                     | 0.56 (0.50, 0.63)  | <0.001         | 83 (9.4)                              | 3.36 (2.68, 4.20)  | <0.001         |
| Hematology                     | 230 (2.2)                                     | 0.78 (0.69, 0.88)  | <0.001         | 33 (3.7)                              | 1.66 (1.17, 2.35)  | 0.004          |
| Renal                          | 131 (1.3)                                     | 0.57 (0.48, 0.68)  | <0.001         | 40 (4.5)                              | 3.40 (2.48, 4.66)  | <0.001         |
| Diabetes                       | 155 (1.6)                                     | 0.76 (0.65, 0.88)  | <0.001         | 33 (3.7)                              | 2.16 (1.53, 3.06)  | <0.001         |
| Obesity                        | 134 (1.3)                                     | 0.84(0.70, 1.00)   | 0.051          | 23 (2.7)                              | 1.93 (1.29, 2.90)  | <0.001         |
| Syndrome                       | 95 (0.9)                                      | 0.60 (0.52, 0.71)  | <0.001         | 24 (2.7)                              | 3.11 (2.33, 4.15)  | <0.001         |

\* 317 missing cases regarding primary outcome \*\* 13 missing; # 2,432 missing

**Table S.6. Demographic and clinical characteristics of children with positive RT-qPCR COVID-19 that fulfilled SIVEP criteria**

|                                    | <b>Overall (%)</b> |
|------------------------------------|--------------------|
|                                    | <b>7,081 (100)</b> |
| Age (years)                        |                    |
| Median (IQR)                       | 47 (1 – 13.9)      |
| Mean (SD)                          | 7.3 (6.9)          |
| Age group (years)                  |                    |
| 0 - 1.9                            | 2464 (34.8)        |
| 2 – 11.9                           | 2526 (35.7)        |
| 12 – 19.9                          | 2091 (29.5)        |
| Gender (n = 7,075)                 |                    |
| Male                               | 3311 (46.7)        |
| Female                             | 3764 (53.3)        |
| Region                             |                    |
| Southeast                          | 2553 (36.1)        |
| South                              | 590 (8.3)          |
| Central-West                       | 521 (7.4)          |
| Northeast                          | 2134 (30.1)        |
| North                              | 1283 (18.1)        |
| Ethnicity (n = 5,821)              |                    |
| White                              | 1912 (32.8)        |
| Black / Brown                      | 3776 (64.9)        |
| Asian                              | 39 (0.66)          |
| Indigenous                         | 94 (1.61)          |
| Signs and symptoms at presentation |                    |
| Fever (n= 6,461)                   | 4,846 (75.0)       |
| Cough (n = 6,460)                  | 4,981 (77.1)       |
| Respiratory distress (n = 6,371)   | 5,056 (79.3)       |
| Oxygen saturation <95% (n = 6,016) | 3,685 (61.2)       |
| Dyspnea (n = 6,614)                | 5,529 (83.6)       |
| Odynophagia (n = 5,370)            | 1,367 (25.5)       |
| Anosmia (n = 2,890)                | 213 (7.4)          |
| Ageusia (n = 2,880)                | 188 (6.5)          |
| Diarrhea (n = 5,435)               | 993 (18.3)         |
| Vomit (n = 5,480)                  | 1,154 (21.0)       |
| Abdominal pain (n = 3,008)         | 365 (12.0)         |
| Number of comorbidities            |                    |
| None                               | 4723 (66.7)        |
| 1                                  | 1997 (28.2)        |
| 2                                  | 298 (4.2)          |
| >3                                 | 63 (0.9)           |
| Main comorbidities                 |                    |
| Asthma                             | 765 (10.8)         |
| Pulmonary                          | 217 (3.1)          |
| Neurologic                         | 530 (7.3)          |
| Oncologic                          | 581 (5.0)          |
| Cardiopathy                        | 285 (4.0)          |
| Hematological                      | 167 (2.4)          |
| Renal                              | 94 (1.3)           |
| Diabetes                           | 161 (2.3)          |
| Obesity                            | 130 (1.8)          |
| Syndrome/chromosomal abn.          | 164 (2.3)          |

Data (n) in the first column represent the available data for those variables with missing values (gender, ethnicity, and signs and symptoms at presentation). For comorbidities, we assumed missing values as the absence of the clinical condition.

**Table S.7. Univariate survival analysis competitive risk according to the demographic and clinical characteristics of children with laboratory-confirmed COVID-19 that fulfilled SIVEP criteria**

|                                | <b>Discharge (%)*<br/>6,166 (89.6)</b> | <b>HR (95% CI)</b>  | <b>P-value</b> | <b>Death (%)*<br/>714 (10.4)</b> | <b>HR (95% CI)</b> | <b>P-value</b> |
|--------------------------------|----------------------------------------|---------------------|----------------|----------------------------------|--------------------|----------------|
| <b>Age (years)</b>             |                                        |                     |                |                                  |                    |                |
| Median (IQR)                   | 52 (10 – 143)                          | 0.993 (0.98, 0.996) | <0001          | 55 (05 – 159)                    | 1.01 (1.00, 1.02)  | 0.005          |
| Mean (SD)                      | 7.5 (6.8)                              |                     |                | 80 (7.5)                         |                    |                |
| <b>Age group (years)</b>       |                                        |                     |                |                                  |                    |                |
| 0 - 19                         | 2,250 (36.5)                           | 0.80 (0.83;0.90)    | <0001          | 152 (21.3)                       | 1.89 (1.55; 2.30)  | <0001          |
| 2 – 11.9                       | 2,148 (34.8)                           | 1.0                 |                | 285 (39.9)                       | 1.0                |                |
| 12 – 19.9                      | 1,768 (28.7)                           | 0.75 (0.70; 0.79)   | <0001          | 227 (38.8)                       | 2.20 (1.81; 2.96)  | <0001          |
| <b>Gender</b>                  |                                        |                     |                |                                  |                    |                |
| Male                           | 3,292 (53.4)                           | 1.01 (0.98; 1.05)   | 0.317          | 368 (51.5)                       | 0.93 (0.80; 1.07)  | 0.33           |
| <b>Region</b>                  |                                        |                     |                |                                  |                    |                |
| Southeast                      | 2,305 (37.4)                           | 1.0                 |                | 189 (26.5)                       | 1.0                |                |
| South                          | 528 (8.6)                              | 0.99 (0.89;1.09)    | 0.91           | 53 (7.4)                         | 1.20 (0.89; 1.63)  | 0.22           |
| Central-West                   | 470 (7.6)                              | 0.87 (0.79; 0.95)   | 0.003          | 41 (5.7)                         | 1.05 (0.75; 1.48)  | 0.73           |
| Northeast                      | 1,741 (28.2)                           | 0.67 (0.63; 0.71)   | <0001          | 298 (41.7)                       | 1.96 (1.64; 2.36)  | <0001          |
| North                          | 1,122 (18.2)                           | 0.85 (0.79; 0.91)   | <0001          | 133 (18.6)                       | 1.42 (1.13; 1.77)  | 0.002          |
| <b>Race#</b>                   |                                        |                     |                |                                  |                    |                |
| White                          | 1,703 (33.6)                           | 1.0                 |                | 170 (28.3)                       | 1.0                |                |
| Black / Brown                  | 3,259 (64.3)                           | 0.86 (0.81; 0.91)   | <0001          | 401 (66.8)                       | 1.21 (1.01, 1.44)  | 0.035          |
| Asian                          | 32 (0.6)                               | 0.76 (0.52; 1.10)   | 0.150          | 7 (1.2)                          | 2.08 (0.98; 4.42)  | 0.053          |
| Indigenous                     | 71 (1.4)                               | 0.63 (0.49; 0.80)   | <0001          | 22 (3.7)                         | 2.85 (1.83; 4.45)  | <0.001         |
| <b>Signs and symptoms</b>      |                                        |                     |                |                                  |                    |                |
| Fever                          | 4,249 (68.9)                           | 0.96 (0.94, 1.04)   | 0.53           | 478 (67.0)                       | 1.01 (0.84, 1.21)  | 0.86           |
| Cough                          | 4,485 (72.7)                           | 0.94 (0.92, 0.98)   | 0.005          | 374 (52.4)                       | 0.48 (0.40, 0.57)  | <0001          |
| Odynophagia                    | 1,243 (20.1)                           | 1.06 (1.00, 1.13)   | 0.04           | 100 (14.0)                       | 0.72 (0.58, 0.89)  | 0.004          |
| Respiratory distress           | 4,385 (71.1)                           | 0.83 (0.78, 0.89)   | <0001          | 564 (78.9)                       | 1.67 (1.33, 2.09)  | <0001          |
| O2 saturation <95%             | 3,061 (49.6)                           | 0.69 (0.65, 0.73)   | <0001          | 504 (70.6)                       | 2.81 (2.30, 3.43)  | <0001          |
| Dyspnea                        | 4,783 (77.6)                           | 0.91 (0.86;0.98)    | 0.009          | 581 (81.4)                       | 1.47 (1.16;1.86)   | 0.001          |
| Anosmia                        | 198 (3.2)                              | 1.06 (0.92, 1.09)   | 0.32           | 12 (1.7)                         | 0.66 (0.37, 1.19)  | 0.17           |
| Ageusia                        | 174 (2.8)                              | 1.07 (0.94, 1.23)   | 0.28           | 11 (1.6)                         | 0.69 (0.38, 1.27)  | 0.23           |
| Diarrhea                       | 880 (14.3)                             | 0.96 (0.89, 1.02)   | 0.25           | 97 (13.6)                        | 1.03 (0.82, 1.29)  | 0.76           |
| Vomit                          | 1,010 (16.4)                           | 0.96 (0.90,1.02)    | 0.22           | 116 (16.2)                       | 1.05 (0.86, 1.31)  | 0.58           |
| Abdominal pain                 | 312 (5.0)                              | 0.90 (0.81, 1.00)   | 0.07           | 37 (5.2)                         | 1.26 (0.89, 1.79)  | 0.18           |
| Comorbidity (yes/no)           | 2,715 (26.1)                           | 0.78 (0.74; 0.81)   | <0001          | 448 (50.6)                       | 2.26 (1.98; 2.58)  | <0001          |
| <b>Number of comorbidities</b> |                                        |                     |                |                                  |                    |                |
| None                           | 4,256 (69.0)                           | 1                   |                | 343 (48.0)                       | 1.0                |                |
| 1                              | 1,648 (26.7)                           | 0.78 (0.74,0.82)    | <0001          | 283 (39.6)                       | 2.01 (1.72, 2.35)  | <0001          |
| 2                              | 220 (3.6)                              | 0.54 (0.47, 0.61)   | <0001          | 70 (9.8)                         | 3.43 (2.67, 4.41)  | <0001          |
| ≥3                             | 42 (0.7)                               | 0.45 (0.34, 0.59)   | <0001          | 18 (2.5)                         | 4.31 (2.64, 6.80)  | <0001          |
| <b>Main comorbidities</b>      |                                        |                     |                |                                  |                    |                |
| Asthma                         | 724 (11.7)                             | 1.56 (1.45; 1.69)   | <0.001         | 30 (4.2)                         | 0.34 (0.24; 0.50)  | <0.001         |
| Pulmonary                      | 177 (2.9)                              | 0.79 (0.69, 0.91)   | <0.001         | 30 (4.2)                         | 1.40 (0.98;2.01)   | 0.065          |
| Neurology                      | 404 (6.6)                              | 0.59 (0.54, 0.65)   | <0.001         | 106 (14.8)                       | 2.26 (1.84;2.67)   | <0.001         |
| Oncology                       | 445 (4.3)                              | 0.46 (0.40,0.52)    | <0.001         | 125 (14.1)                       | 3.22 (2.68, 3.87)  | <0.001         |
| Cardiology                     | 190 (3.1)                              | 0.52 (0.45, 0.59)   | <0.001         | 74 (10.4)                        | 3.36 (2.68, 4.20)  | <0.001         |
| Hematology                     | 136 (2.2)                              | 0.74 (0.64, 0.86)   | <0.001         | 26 (3.6)                         | 1.66 (1.17, 2.35)  | 0.004          |
| Renal                          | 64 (1.0)                               | 0.51 (0.40, 0.65)   | <0.001         | 29 (4.1)                         | 3.40 (2.48, 4.66)  | <0.001         |
| Diabetes                       | 122 (2.0)                              | 0.72 (0.61, 0.86)   | <0.001         | 21 (2.9)                         | 2.16 (1.53, 3.06)  | <0.001         |
| Obesity                        | 134 (1.3)                              | 0.85 (0.70, 1.03)   | 0.113          | 23 (2.7)                         | 1.93 (1.29, 2.90)  | <0.001         |
| Syndrome                       | 120 (1.9)                              | 0.62 (0.52, 0.74)   | <0.001         | 40 (5.6)                         | 3.11 (2.33, 4.15)  | <0.001         |

\* 201 missing cases regarding primary outcome, #1,260 missing cases regarding ethnicity



**Table S.8. Multivariate survival analysis competing risk in children with laboratory-confirmed COVID-19 that fulfilled SIVEP criteria**

|                          | <b>Discharge (%)*</b><br><b>6,166 (89.6)</b> | <b>HR (95% CI)</b> | <b>P-value</b> | <b>Death (%)*</b><br><b>714 (10.4)</b> | <b>HR (95% CI)</b> | <b>P-value</b> |
|--------------------------|----------------------------------------------|--------------------|----------------|----------------------------------------|--------------------|----------------|
| <b>Age group (years)</b> |                                              |                    |                |                                        |                    |                |
| 0 - 19                   | 2,250 (36.5)                                 | 0.76 (0.72;0.81)   | <0.001         | 152 (21.3)                             | 2.31 (1.85; 2.88)  | <0.001         |
| 2 - 11.9                 | 2,148 (34.8)                                 | 1.0                |                | 285 (39.9)                             | 1.0                |                |
| 12 - 19.9                | 1,768 (28.7)                                 | 0.72 (0.67; 0.76)  | <0.001         | 227 (38.8)                             | 2.47 (1.99; 3.01)  | <0.001         |
| <b>Region</b>            |                                              |                    |                |                                        |                    |                |
| Southeast                | 2,305 (37.4)                                 | 1.0                |                | 189 (26.5)                             | 1.0                |                |
| South                    | 528 (8.6)                                    | 0.99 (0.88;1.10)   | 0.86           | 53 (7.4)                               | 1.24 (0.89; 1.70)  | 0.177          |
| Central-West             | 470 (7.6)                                    | 0.77 (0.69; 0.86)  | <0.001         | 41 (5.7)                               | 1.25 (0.85; 1.82)  | 0.241          |
| Northeast                | 1,741 (28.2)                                 | 0.63 (0.58; 0.67)  | <0.001         | 298 (41.7)                             | 2.18 (1.74; 2.73)  | <0.001         |
| North                    | 1,122 (18.2)                                 | 0.81 (0.75; 0.88)  | <0.001         | 133 (18.6)                             | 1.52 (1.16; 1.97)  | 0.002          |
| <b>Race#</b>             |                                              |                    |                |                                        |                    |                |
| White                    | 1,703 (33.6)                                 | 1.0                |                | 170 (28.3)                             | 1.0                |                |
| Black / Brown            | 3,259 (64.3)                                 | 0.95 (0.89; 1.02)  | 0.171          | 401 (66.8)                             | 1.08 (0.88;1.34)   | 0.438          |
| Asian                    | 32 (0.6)                                     | 0.82 (0.56; 1.20)  | 0.324          | 7 (1.2)                                | 1.97 (0.90; 4.28)  | 0.086          |
| Indigenous               | 71 (1.4)                                     | 0.63 (0.49; 0.82)  | <0.000         | 22 (3.7)                               | 3.24 (2.02; 5.17)  | <0.001         |
| <b>Comorbidities</b>     |                                              |                    |                |                                        |                    |                |
| None                     | 4,256 (69.0)                                 | 1.0                |                | 343 (48.0)                             | 1.0                |                |
| 1                        | 1,648 (26.7)                                 | 0.72 (0.67; 0.76)  | <0.001         | 283 (39.6)                             | 2.58 (2.15;3.09)   | <0.001         |
| 2                        | 220 (3.6)                                    | 0.46 (0.40;0.54)   | <0.001         | 70 (9.8)                               | 4.18 (3.13; 5.58)  | <0.001         |
| ≥3                       | 42 (0.7)                                     | 0.36 (0.27;0.49)   | <0.001         | 18 (2.5)                               | 6.31 (3.85; 10.3)  | <0.001         |

\* 201 missing cases regarding primary outcome, #1,260 missing cases regarding ethnicity

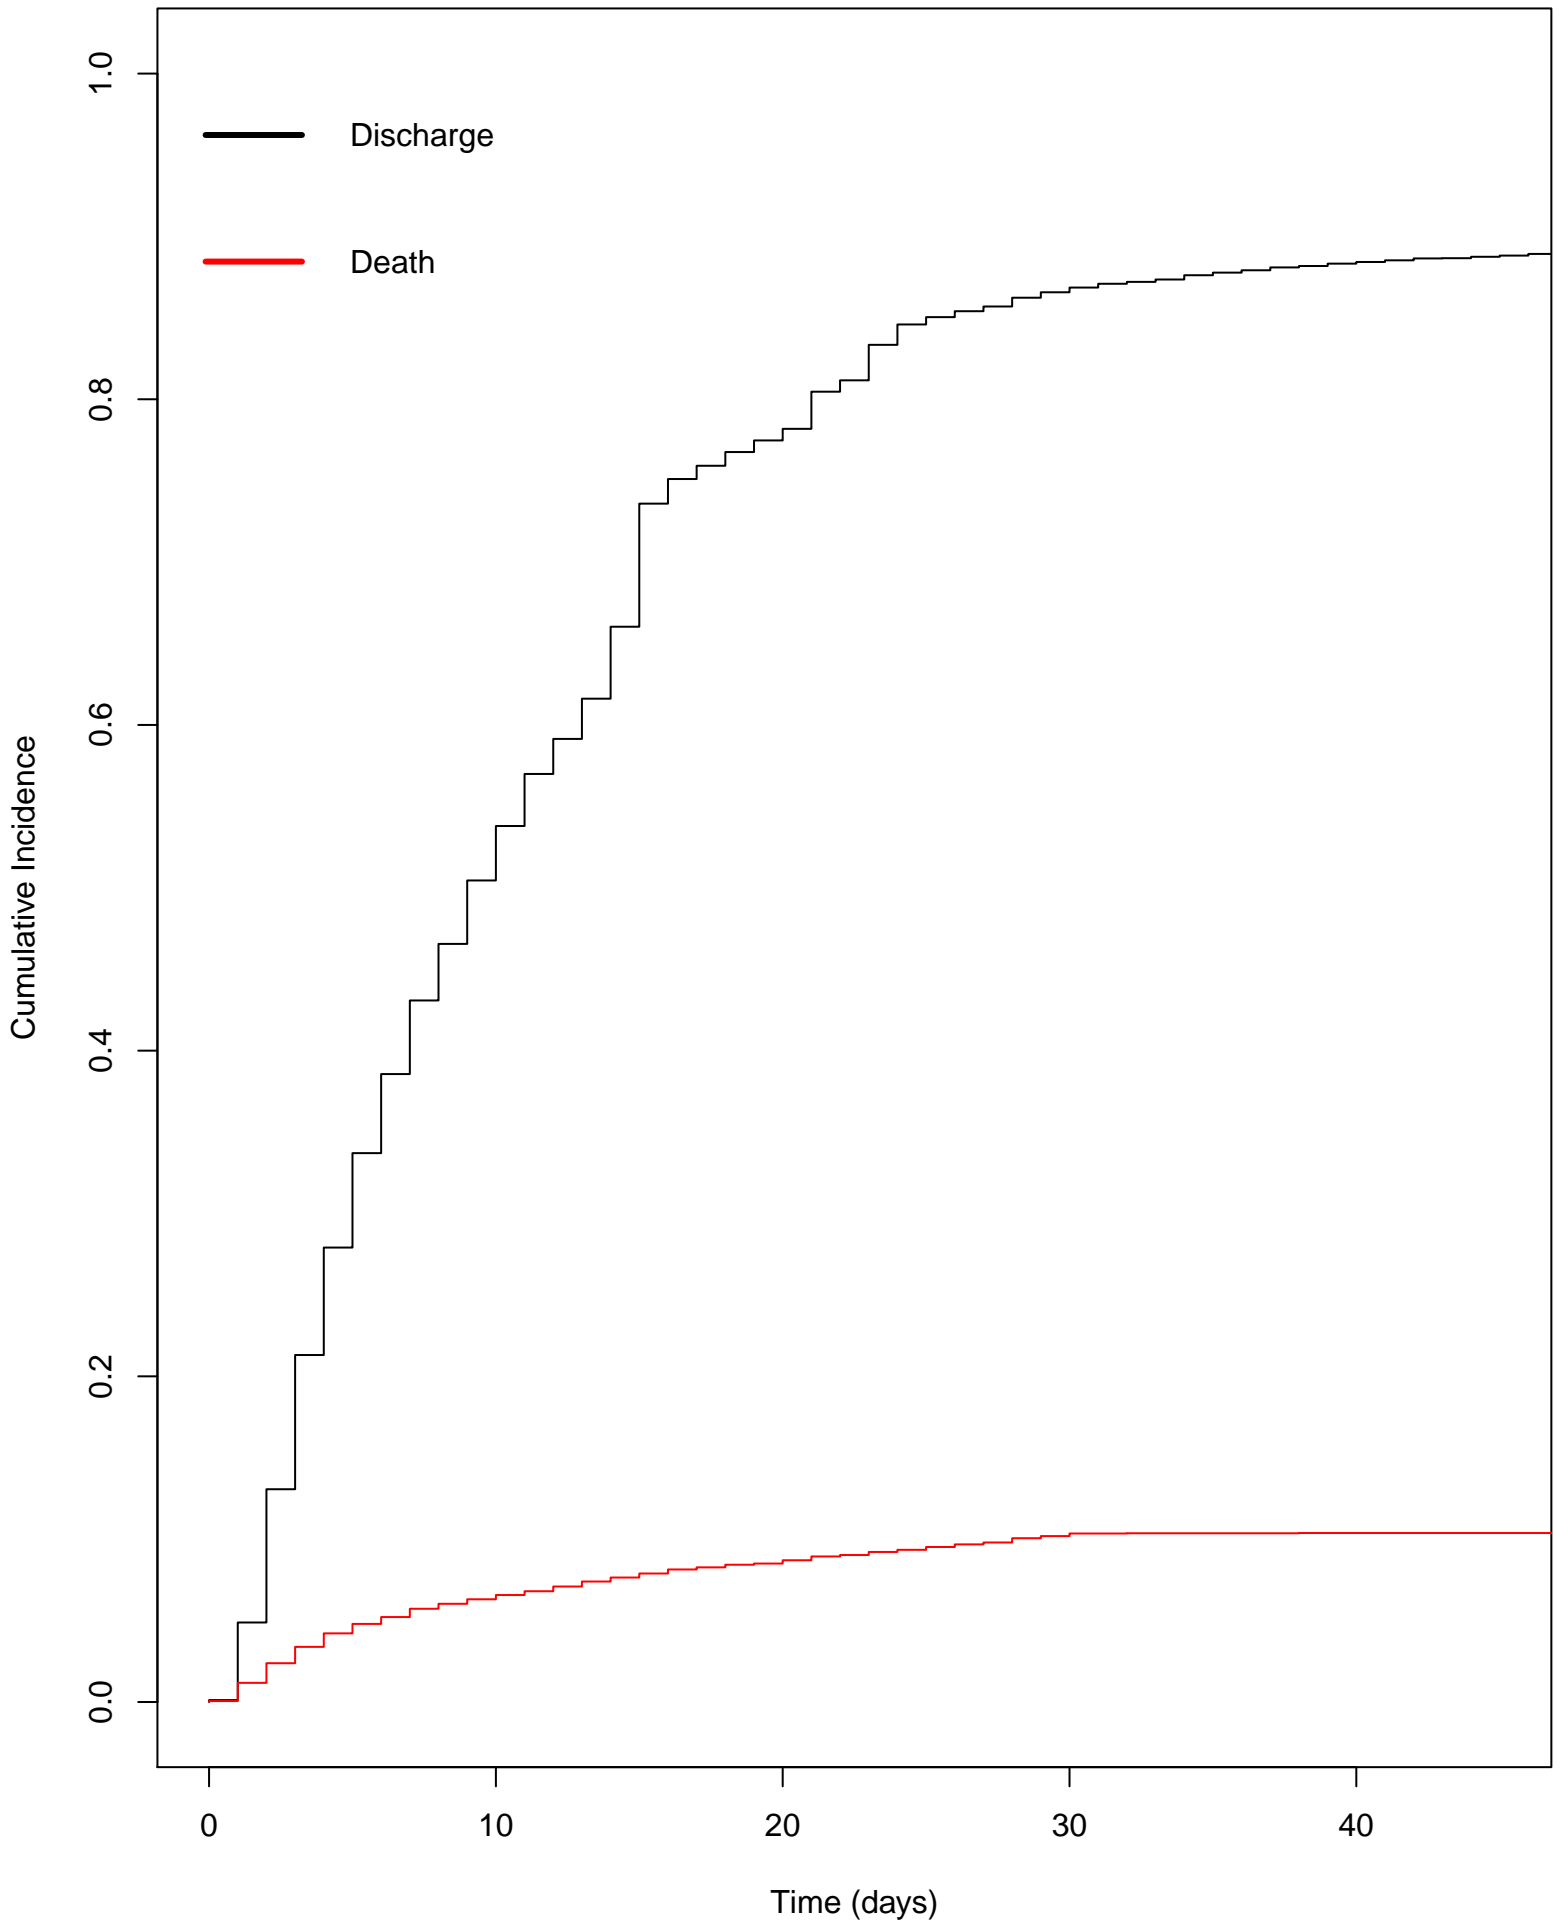

A

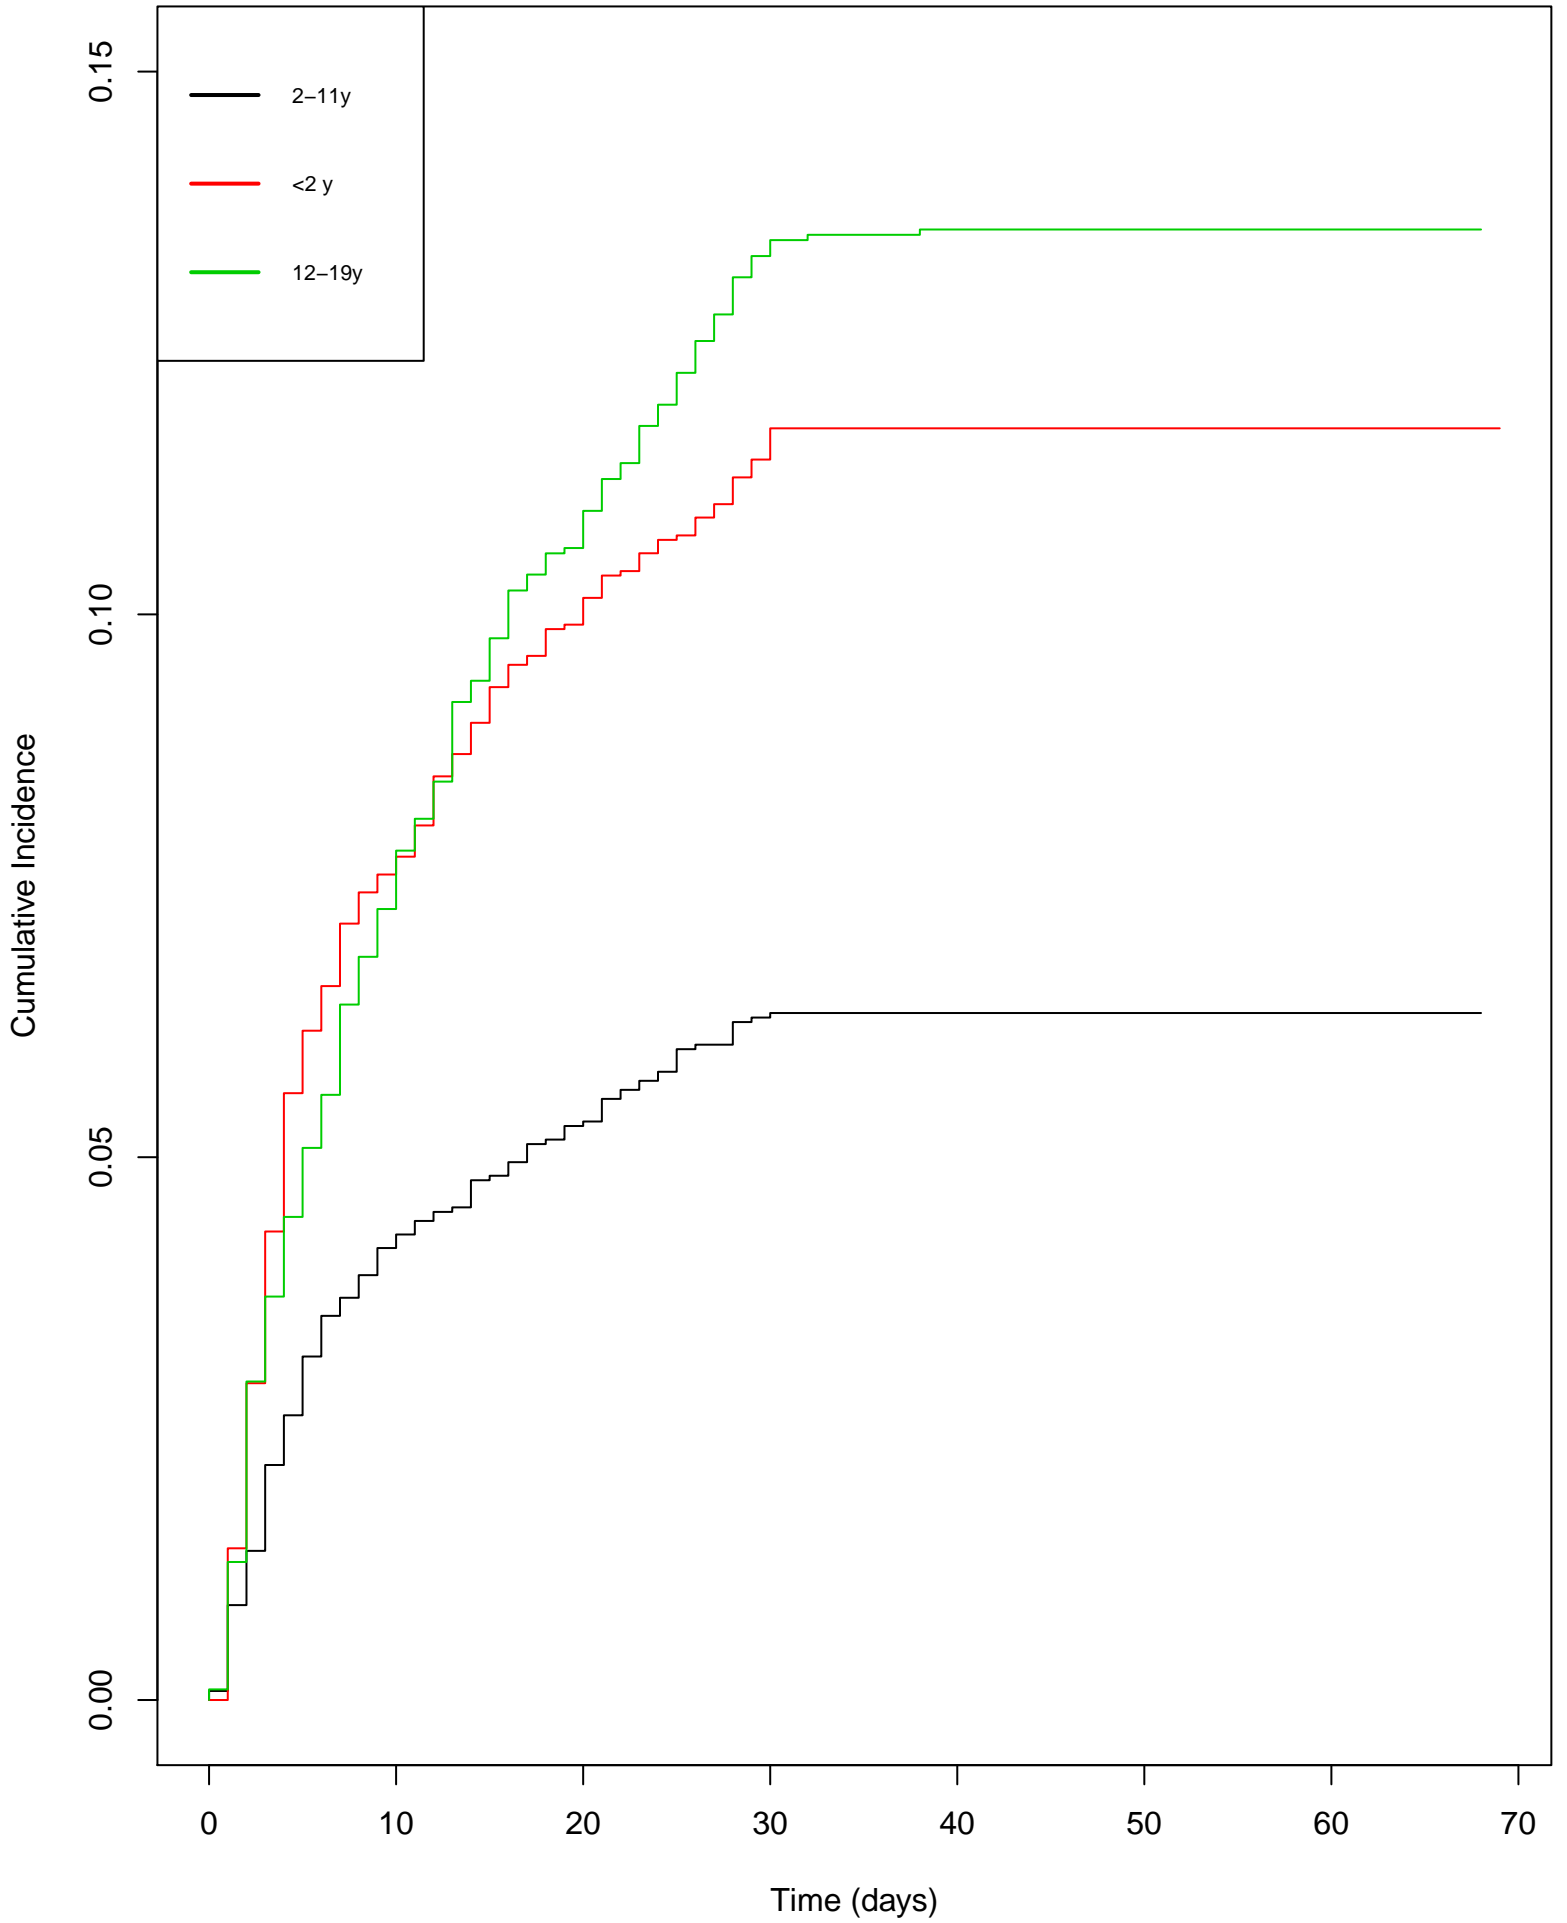

**D**

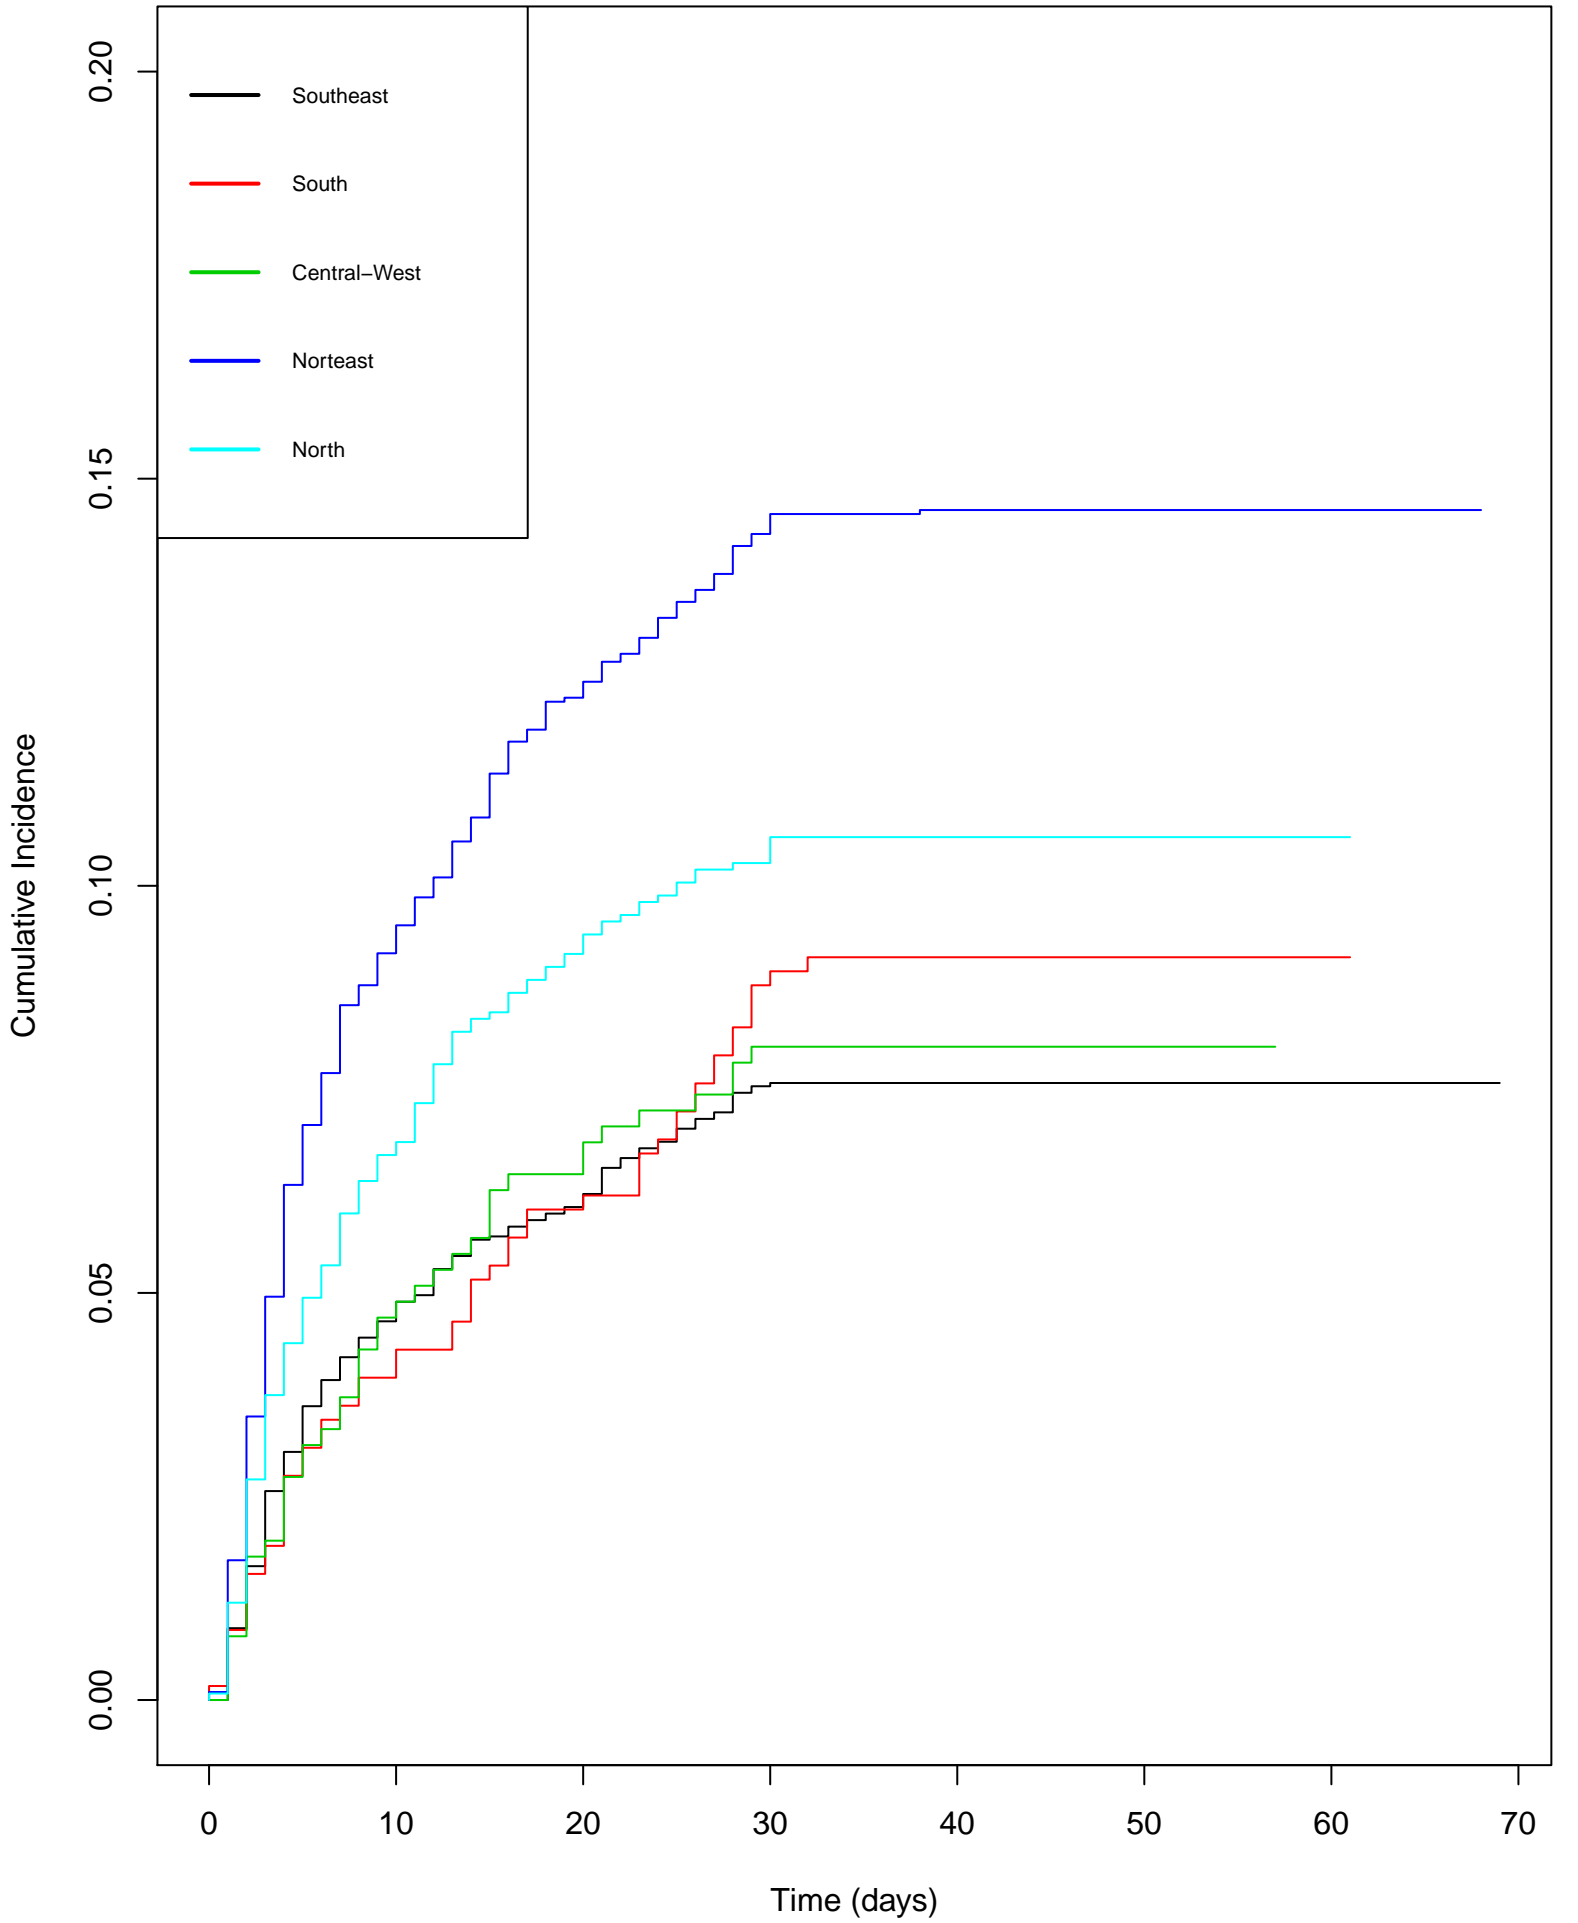

C

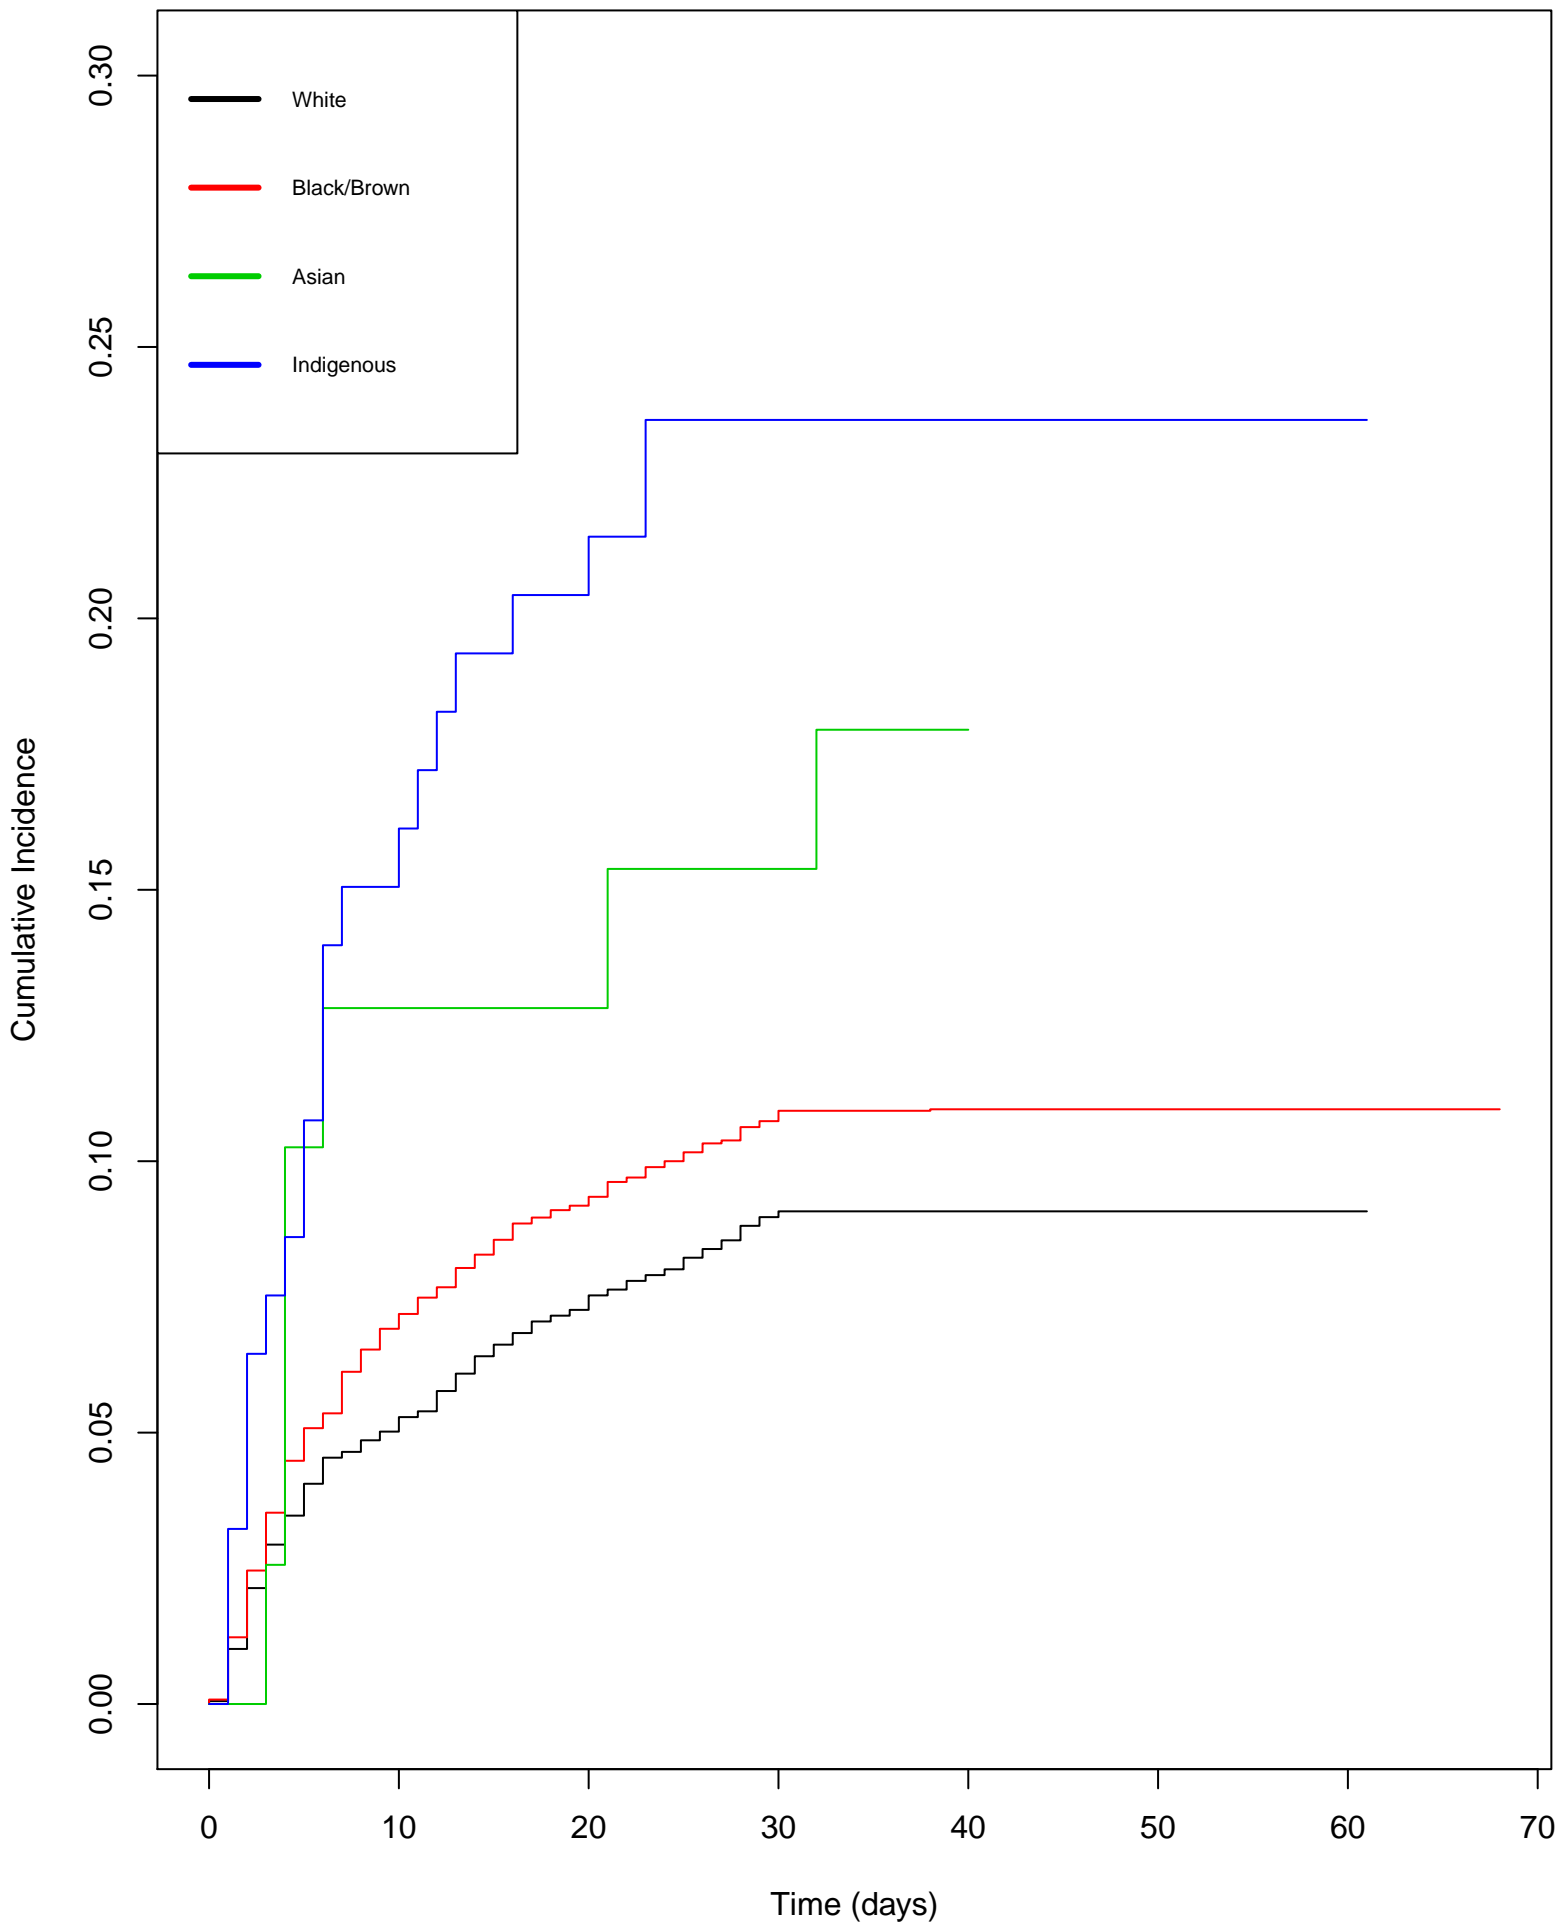

D

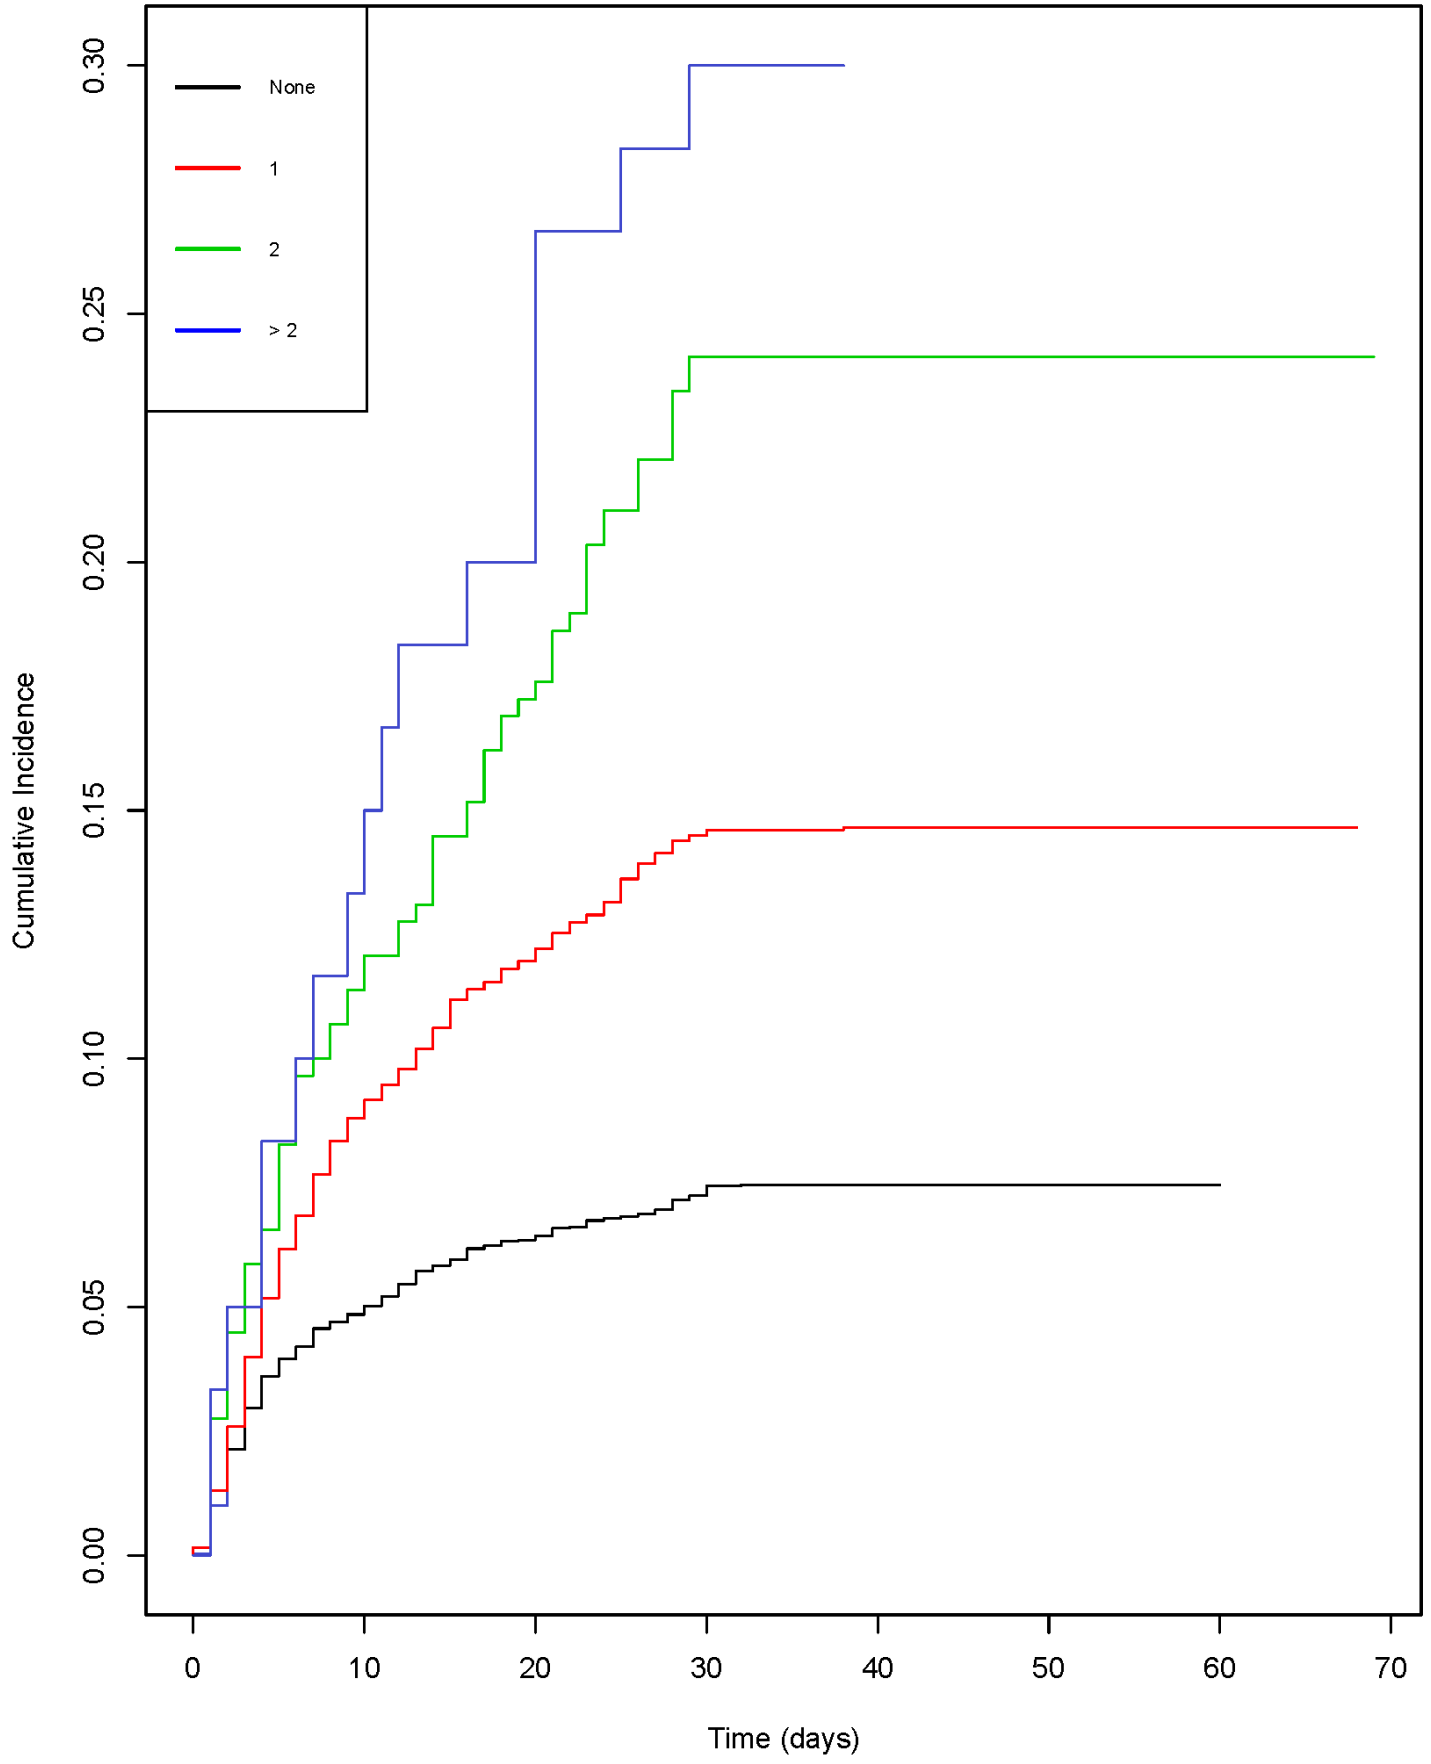

## Supplementary figures legends

Figure S.9. Cumulative incidence functions for mortality and discharge in children and adolescents with Covid-19 that fulfilled SIVEP criteria.

Figure S.10. Cumulative incidence functions for mortality of children and adolescents with COVID-19 that fulfilled SIVEP criteria according to the (A) Age-group; (B) Region; (C) Ethnicity; and (D) Number of comorbidities
